# Supplementary material
Source: publisher figshare collection journal article supplement (https://acs.figshare.com/ndownloader/files/3806158)
Supplement: Supplementary file 1 [file 3806158]

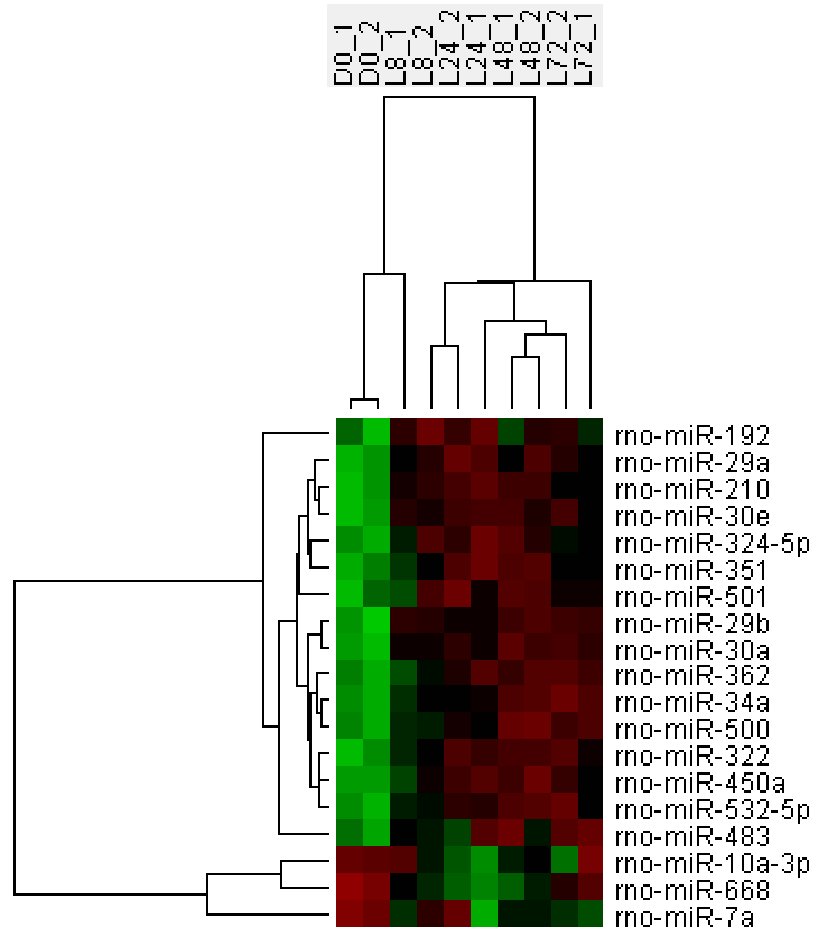

**Figure S1.** Expression profile of the luteolin-responsive miRNAs. Heat map comparing the miRNA expression of PC12 cells treated with luteolin (20  $\mu$ M) for 0, 8, 24, 48, or 72 h. The color bar indicates relative miRNA expression in duplicate arrays; red and green indicate up-regulated and down-regulated expression, respectively. A total of 16 and three miRNAs shown in the heat map were robustly and significantly up-regulated ( $\log_2$  ratio  $\geq 0.7$ ) and down-regulated ( $\log_2$  ratio  $\leq -0.7$ ), respectively.

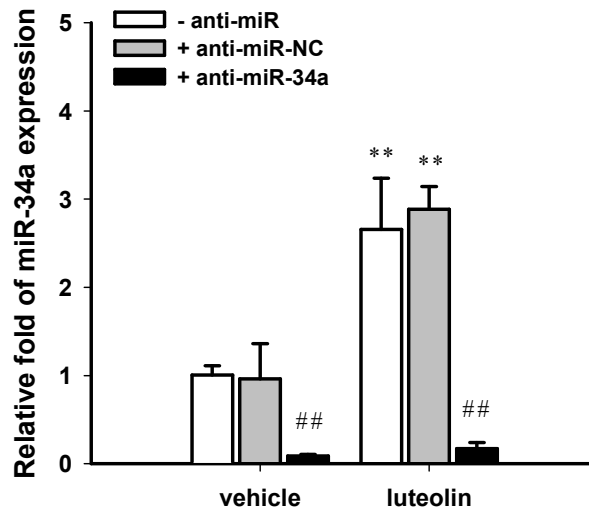

**Figure S2.** Effects of miR-34a antisense on the mature miR-34a expression in PC12 cells. The cells were transfected with miRNA antisense negative control (anti-miR-NC) or miR-34a antisense oligonucleotides (anti-miR-34a) for 24 h as described in Materials and Methods. After transfection, PC12 cells were treated with vehicle (0.1% DMSO) or luteolin (20  $\mu$ M). After 24 h treatment, the levels of mature miR-34a were detected by RT-Q-PCR as described in Materials and Methods. Data represent the mean  $\pm$  SD from three independent experiments. \*\* $p < 0.01$  represents significant differences compared to vehicle-treated cells. ## $p < 0.01$  represents significant differences compared to anti-miR-NC-transfected cells.
